# Supplementary material for: Internet-Based Group Intervention for Ovarian Cancer Survivors: Feasibility and Preliminary Results
Source: PubMed Central journal article supplement (PMC5789163; doi:10.2196/cancer.8430), 2018-01-15
Supplement: cancer_v4i1e1_app2.pdf [file cancer_v4i1e1_app2.pdf]

## Multimedia Appendix 2

Results of the usability assessment results for laboratory and field usability (n = 11 trials<sup>a</sup>).

| <b>Task</b>                                | <b>Function</b>           | <b>Seconds to perform<br/>Mean (range)</b> | <b>Errors<br/>Total (range)</b> |
|--------------------------------------------|---------------------------|--------------------------------------------|---------------------------------|
| Log into website                           | Learnability <sup>b</sup> | 103.7 (0.5-720.0)                          | 2 (0-1)                         |
| Access daily<br>gratitude journal          | Learnability              | 8.8 (0.5-60.0)                             | 4 (0-2)                         |
|                                            | Memorability <sup>c</sup> | 1.0 (0.5-4.0)                              | 1 (0-1)                         |
| Access relaxation<br>recordings            | Learnability              | 1.2 (0.5-8.0)                              | 4 (0-1)                         |
| Access weekly<br>overview                  | Learnability              | 3.7 (0.5-15.0)                             | 3 (0-1)                         |
|                                            | Memorability              | 2.1 (0.5-10.0)                             | 2 (0-1)                         |
| Access weekly<br>overview<br>independently | Efficiency <sup>d</sup>   | 0.8 (0.5-3.0)                              | 2 (0-1)                         |
| Access web<br>conference                   | Learnability              | 2.2 (0.5-10.0)                             | 5 (0-2)                         |
| Turn off tablet                            | Learnability              | 0.5 (0.5-0.5)                              | 0 (0)                           |

<sup>a</sup>The 11 trials include six usability testing trials and the five field usability testing trials. These trials included nine participants as two participants completed both lab and field usability testing.

<sup>b</sup>Learnability was assessed by the number of seconds to first perform a new task.

<sup>c</sup>Memorability was assessed by the number of second to perform a task after a delay. It was only meaningful in the two specific contexts reported above.

<sup>d</sup>Efficiency was assessed by the number seconds to perform a leaned task. It was only meaningful in the specific context reported above.
