# Supplementary material for: Internet-Based Group Intervention for Ovarian Cancer Survivors: Feasibility and Preliminary Results
Source: PubMed Central journal article supplement (PMC5789163; doi:10.2196/cancer.8430), 2018-01-15
Supplement: cancer_v4i1e1_app3.pdf [file cancer_v4i1e1_app3.pdf]

## Multimedia Appendix 3

Weekly session evaluation scores averaged across 10 weeks.

| <b>Question</b>                                                                           | <b>Mean (SD)</b>         |
|-------------------------------------------------------------------------------------------|--------------------------|
| What is your satisfaction with today's group session?                                     | 9.00 (0.74)              |
| What is your desire to return to the next group session?                                  | 9.20 (0.49)              |
| To what extent did today's discussion adequately address the topics?                      | 8.75 (0.64)              |
| To what extent do you feel able to implement the strategies discussed in today's session? | 8.25 (0.81)              |
| How comfortable were you with the video conferencing platform part of the meeting today?  | 8.26 (0.90) <sup>a</sup> |
|                                                                                           | 7.76 (1.03) <sup>b</sup> |
|                                                                                           | 9.08 (0.87) <sup>c</sup> |

Higher scores reflect better ratings. The scale ranges from 0 to 10.

<sup>a</sup>The average score for all field trial groups

<sup>b</sup>The average score for field trial groups 1-3

<sup>c</sup>The average score for field trial groups 4-5
